# Supplementary material for: The strongest dative bond in main-group compounds. Theoretical study of OAeF− (Ae = Be–Ba)
Source: Royal Society of Chemistry journal article supplement (doi:10.1039/d4cp01909a), 2024-01-01
Supplement: d4cp01909a1.pdf [file d4cp01909a1.pdf]

**Supporting Information for:**

**The strongest dative bond in main-group compounds.  
Theoretical study of OAeF<sup>-</sup> (Ae = Be – Ba)**

L. Qin, R. Liu, F. Sagan, Z. Zhang, L. Zhao, M. Mitoraj, G. Frenking

**Table S1**

**Figures S1 and S2**

**Table S1: EDA-NOCV results of OAeF<sup>-</sup> using OAe<sup>-</sup> (D) and F (D) in the electronic doublet states as interacting fragments. All molecules are calculated at the equilibrium geometries except for the linear structure of OBaF<sup>-</sup>. The calculations were carried out at the BP86/DZP level using BP86/def2-TZVPP optimized geometries. Energy values are given in kcal mol<sup>-1</sup>.**

| Fragments                               | OBe <sup>-</sup> (D) + F(D) | OMg <sup>-</sup> (D) + F(D) | OCa <sup>-</sup> (D) + F(D) | OSr <sup>-</sup> (D) + F(D) | OBa <sup>-</sup> (D) + F(D) | OBa <sup>-</sup> (D) + F(D) |
|-----------------------------------------|-----------------------------|-----------------------------|-----------------------------|-----------------------------|-----------------------------|-----------------------------|
| Structure                               | linear                      | linear                      | bent                        | bent                        | bent                        | linear                      |
| $\Delta E_{\text{int}}$                 | -157.9                      | -138.9                      | -124.6                      | -120.5                      | -121.1                      | -113.5                      |
| $\Delta E_{\text{Pauli}}$               | 200.6                       | 128.5                       | 85.3                        | 55.8                        | 54.1                        | 49.2                        |
| $\Delta E_{\text{elstat}}^{\text{[a]}}$ | -94.0 (26.2%)               | -69.2 (25.9 %)              | -49.9 (23.8%)               | -28.8 (16.3 %)              | -28.5 (16.3%)               | -26.9 (16.5 %)              |
| $\Delta E_{\text{orb}}^{\text{[a]}}$    | -264.5 (73.8%)              | -198.2 (74.1 %)             | -160.0 (76.2%)              | -147.4 (83.7 %)             | -146.7 (83.7%)              | -135.7 (83.5 %)             |

<sup>a</sup>The values in parentheses give the percentage contribution to the total attractive interactions  $\Delta E_{\text{elstat}} + \Delta E_{\text{orb}}$

**Fig.S1: The five energetically highest-lying occupied MOs of OAeF<sup>-</sup> (Ae = Be-Ba) at the BP86/def2-TZVPP level of theory. (Isovalue 0.05e/au<sup>3</sup>).**

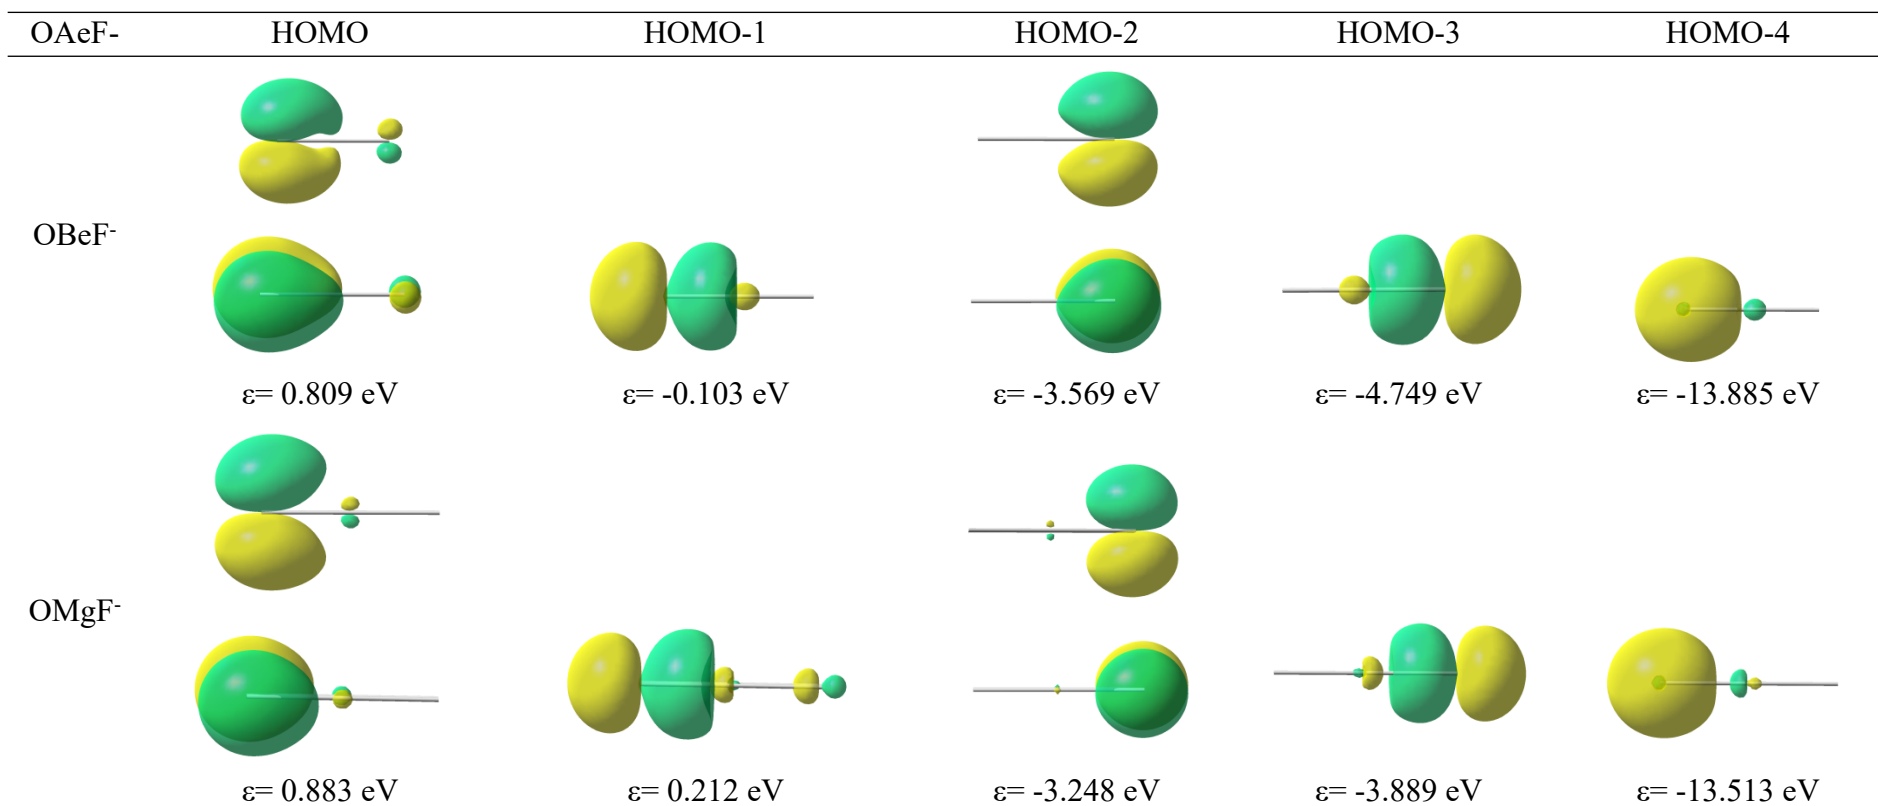

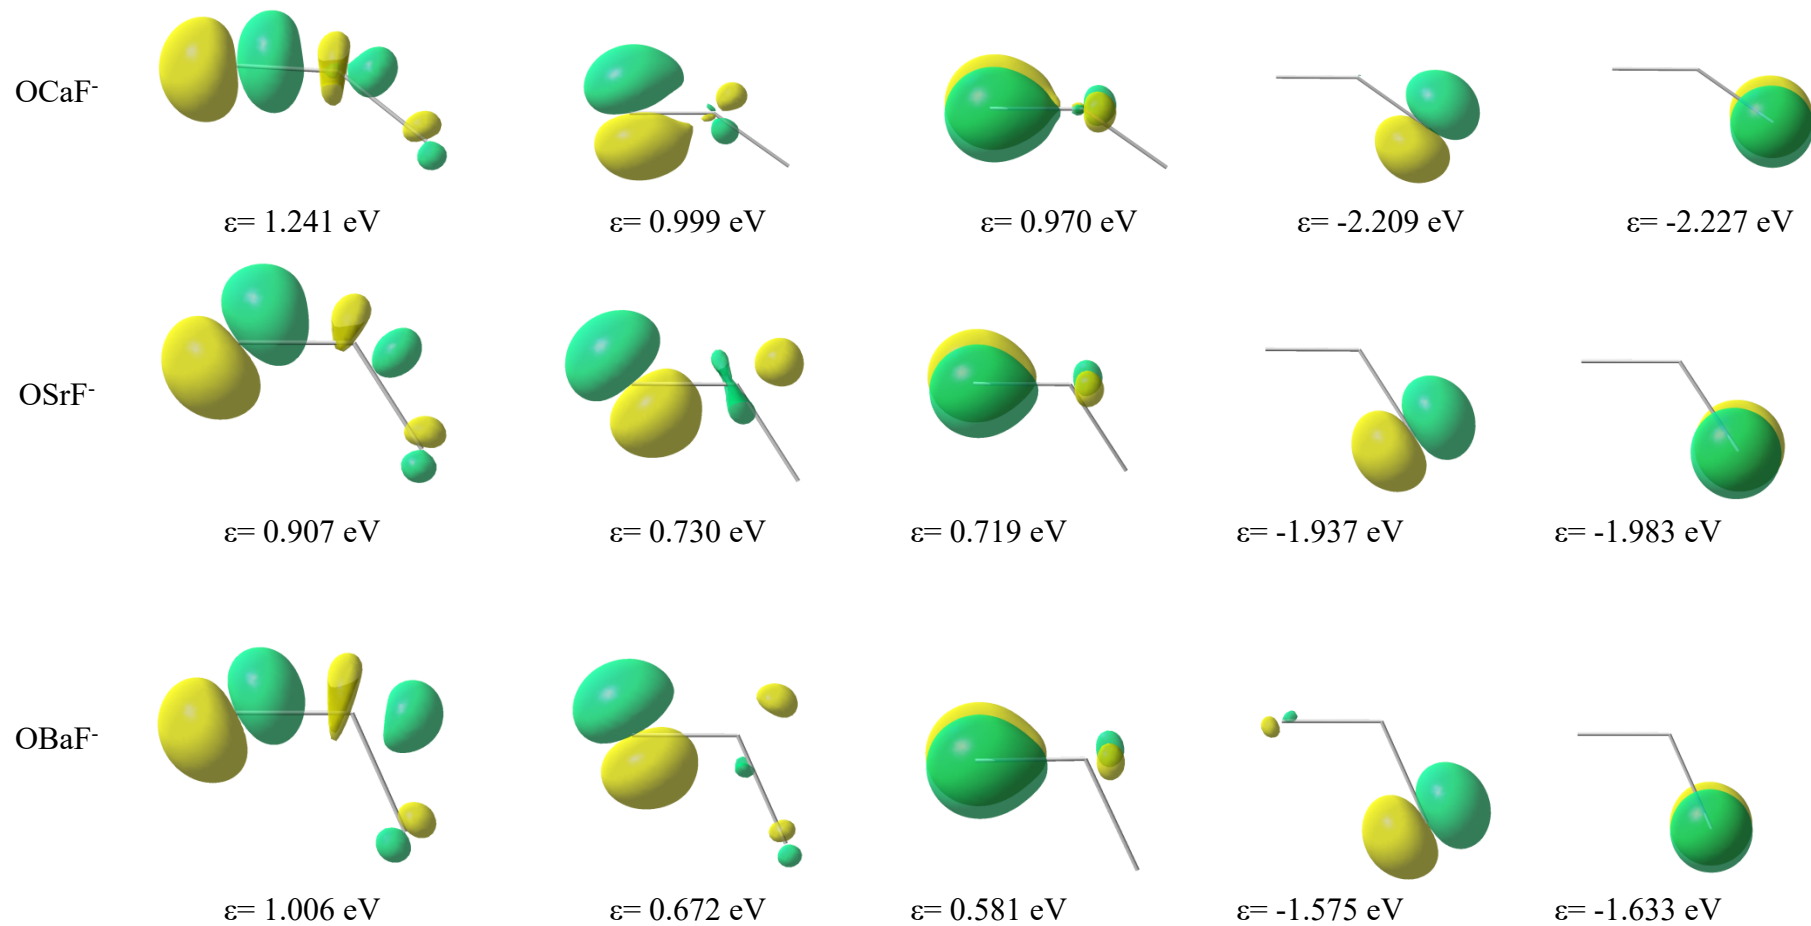

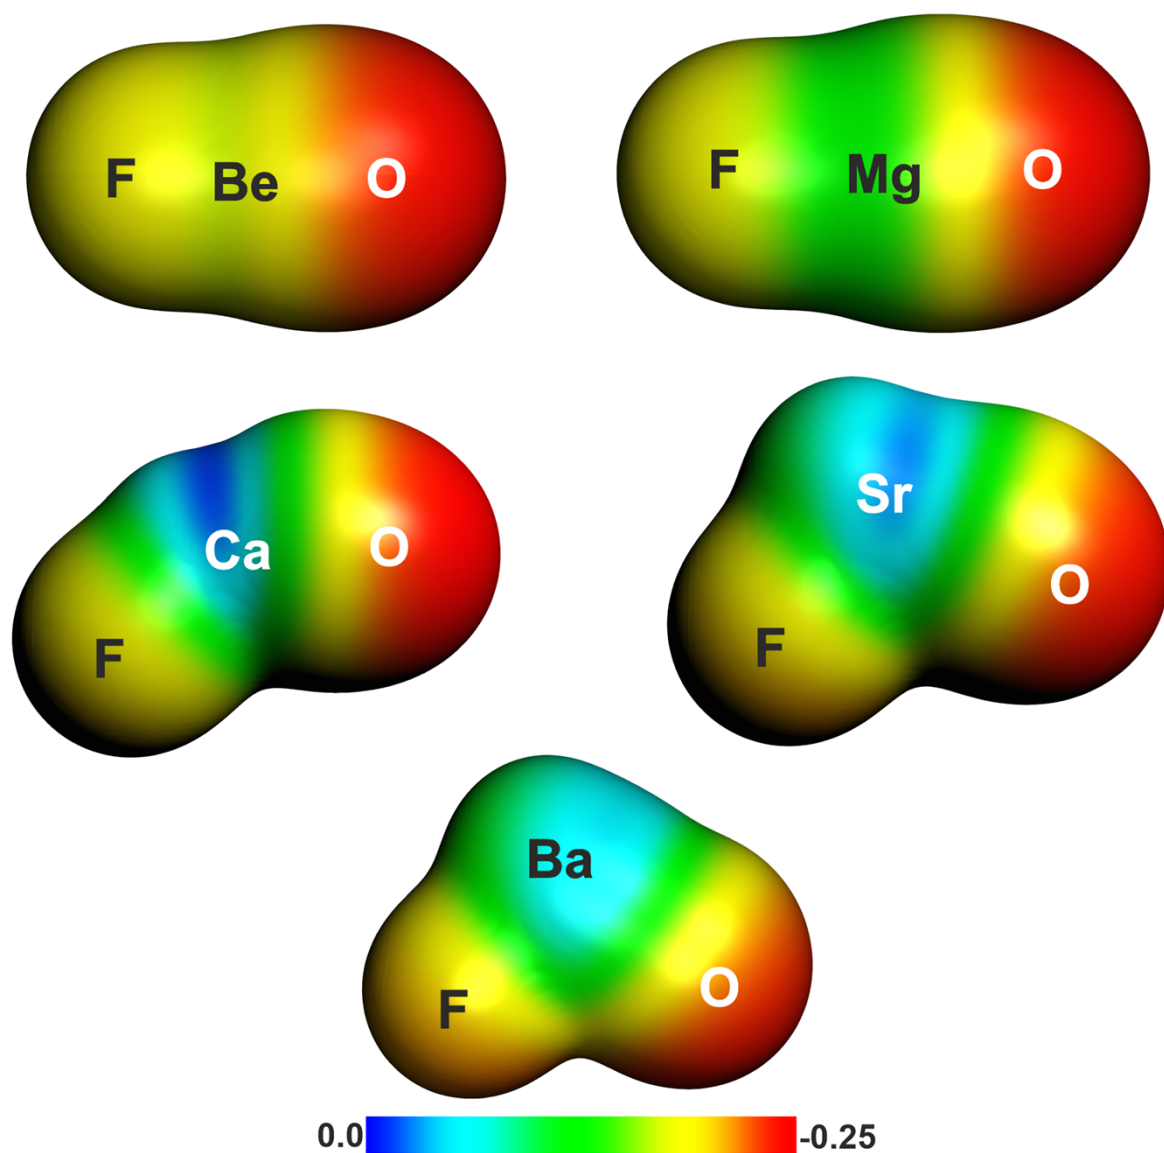

**Fig.S2: Plot of molecular electrostatic potentials of OAEF<sup>-</sup> systems at the BP86/TZP level of theory, computed with value of 0.001 au for the contour of the electronic density.**
